# Supplementary material
Source: PubMed Central journal article supplement (PMC1933460)

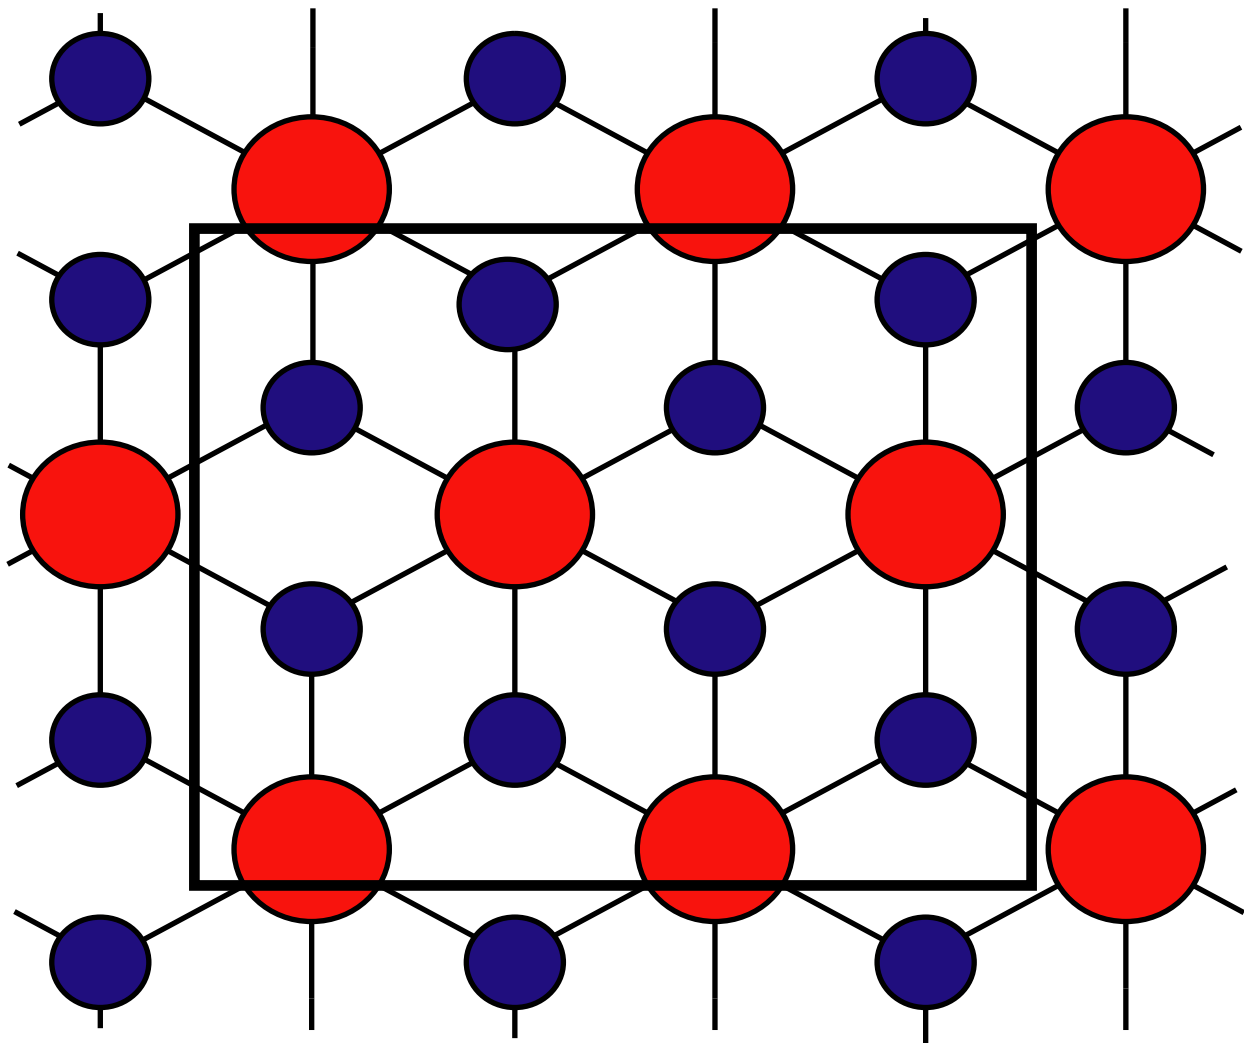

Figure S1

Supplement: pcbi.0030115.sg001.pdf [file pcbi.0030115.sg001.pdf]

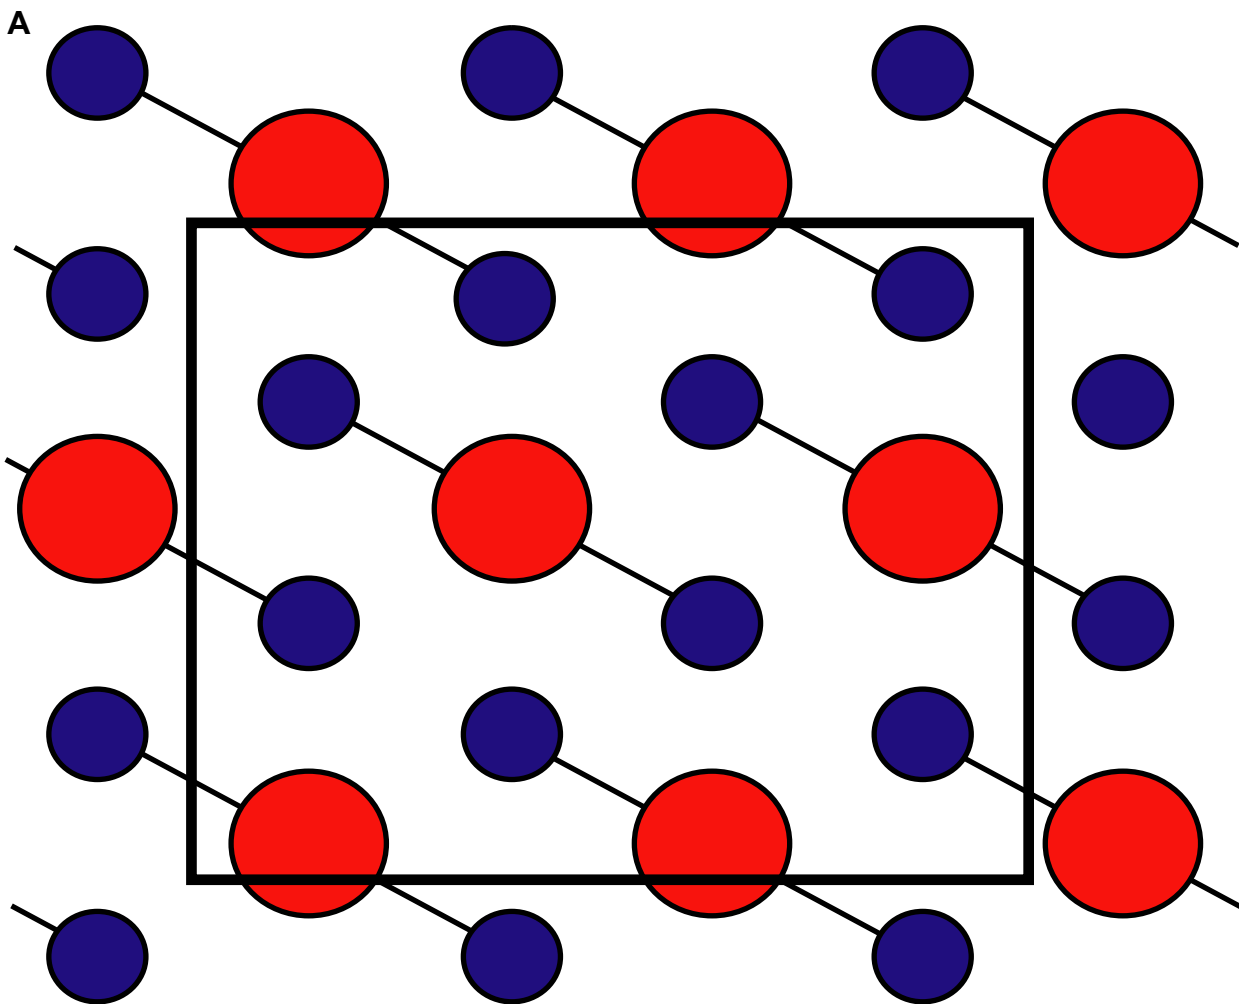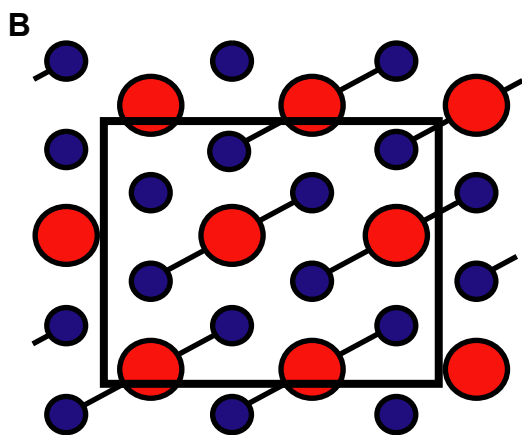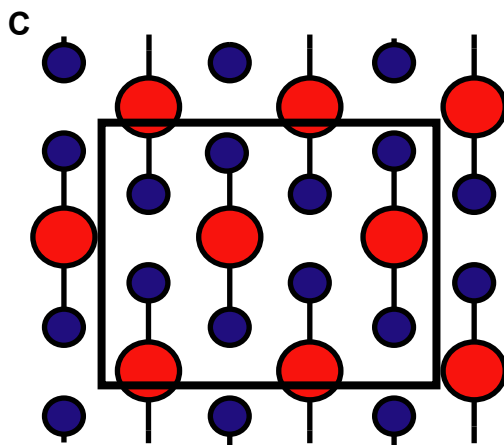

Figure S2

Supplement: pcbi.0030115.sg002.pdf [file pcbi.0030115.sg002.pdf]

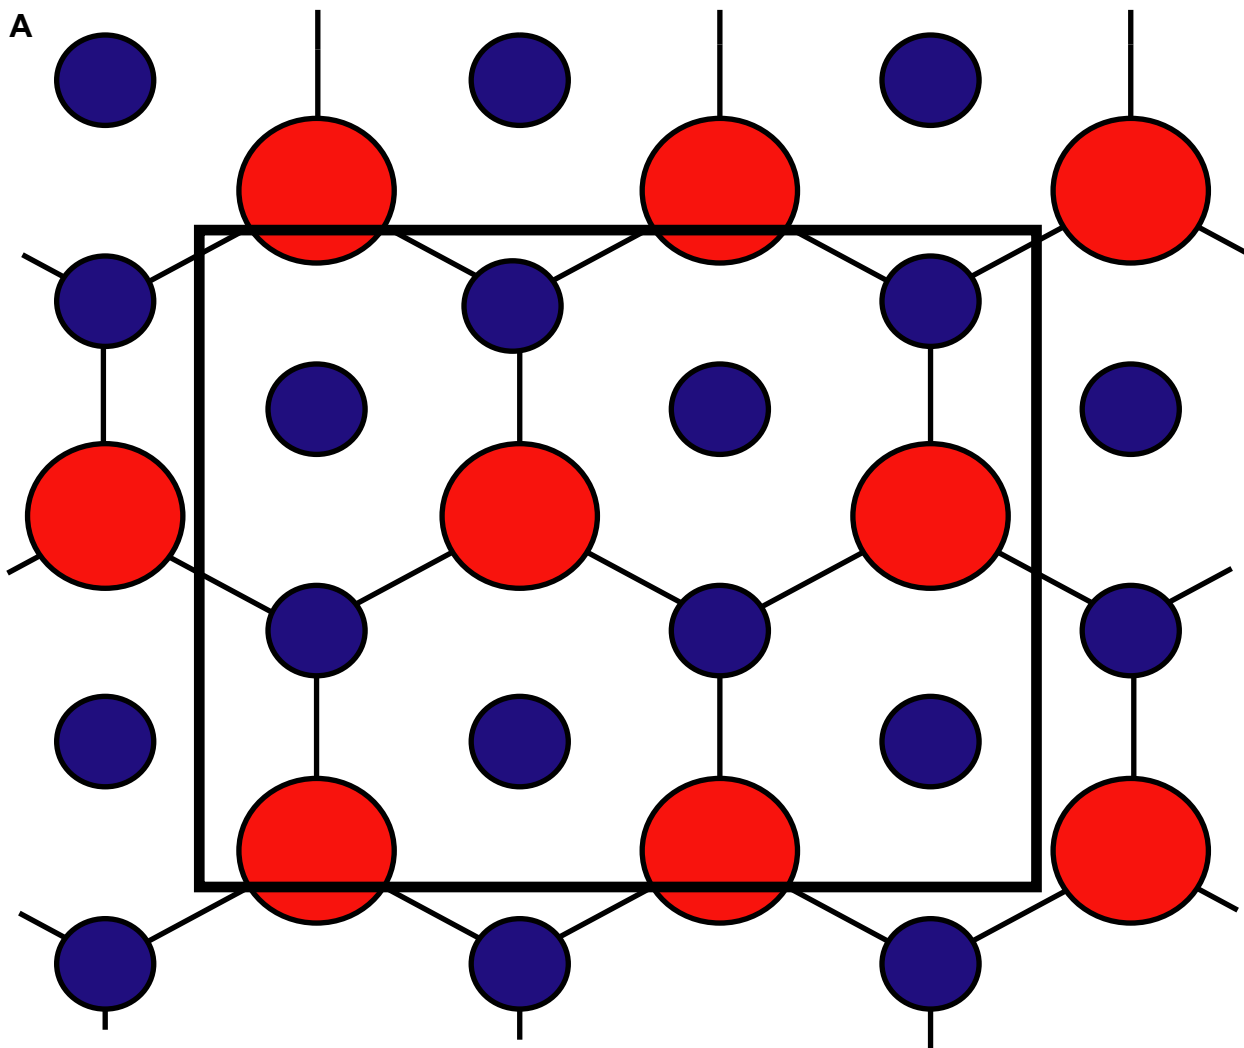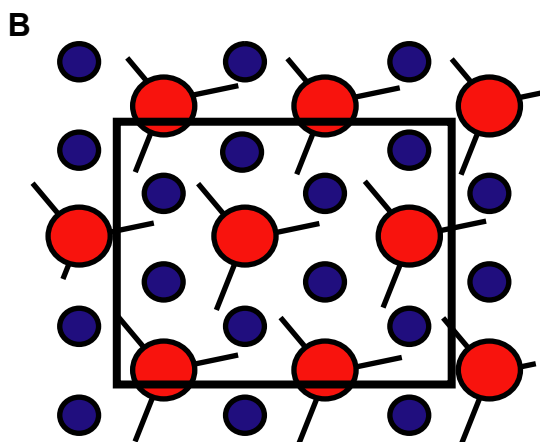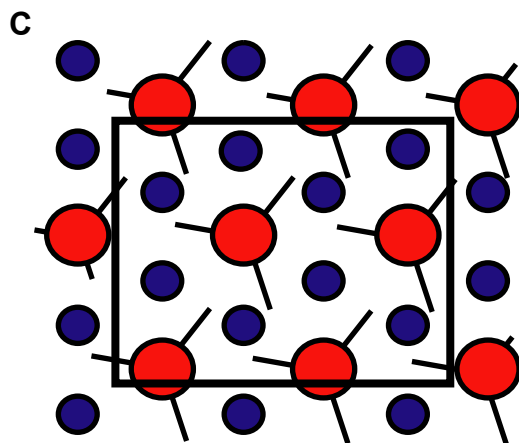

Figure S3

Supplement: pcbi.0030115.sg003.pdf [file pcbi.0030115.sg003.pdf]

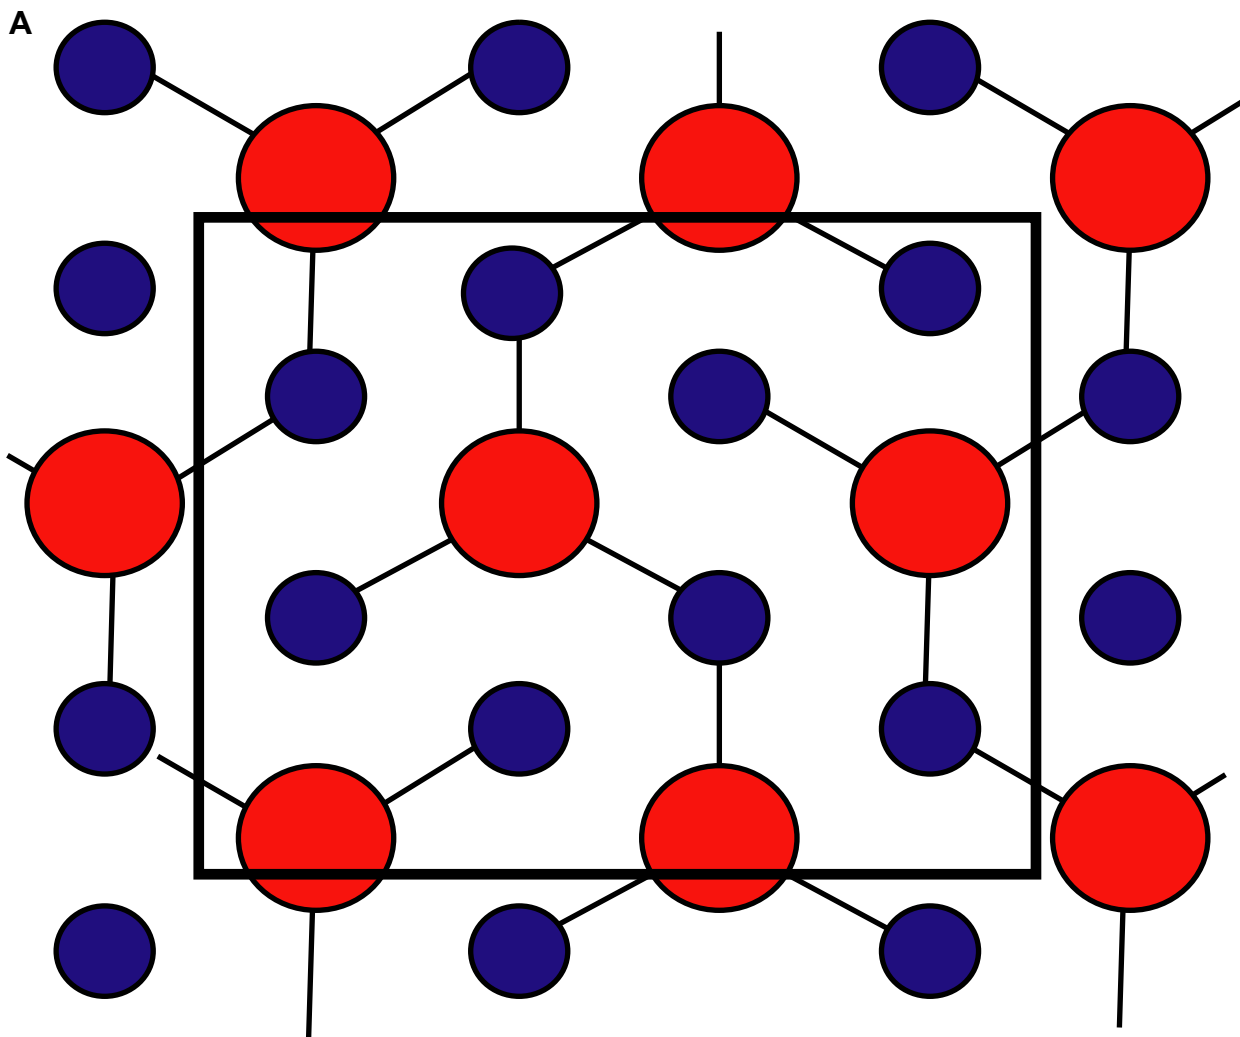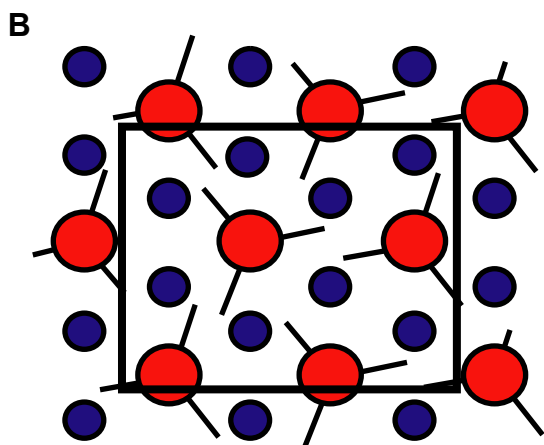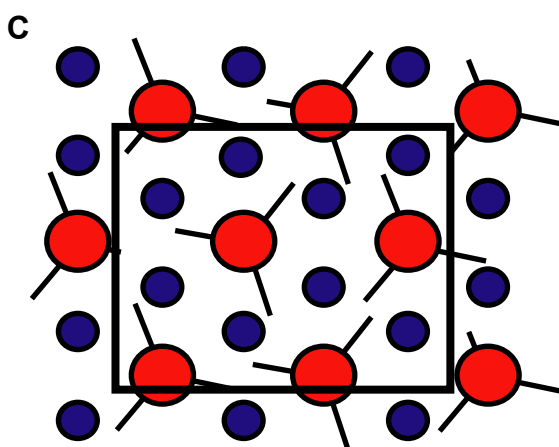

Figure S4

Supplement: pcbi.0030115.sg004.pdf [file pcbi.0030115.sg004.pdf]
